# Supplementary material for: Extinction recall of fear memories formed before stress is not affected despite higher theta activity in the amygdala
Source: eLife. 2018 Aug 13;7:e35450. doi: 10.7554/eLife.35450 (PMC6125126; doi:10.7554/eLife.35450)
Supplement: Figure 1—source data 1. [file elife-35450-fig1-data1.xlsx]

## Sheet: Figure 1b
			Conditioning							Fear Recall and Extinction										Extinction Recall
	Control
	Animals	Pretone	Tone Habituation	First Trial Block	Last Trial Block			Pretone	Trial Block1	Trial Block2	Trial Block3	Trial Block4	Trial Block5	Trial Block6	Trial Block7			Pretone	Trial Block1	Trial Block2	Trial Block3	Trial Block4	Trial Block5	Trial Block6	Trial Block7
	Rat1	0	4.58	11.175	87.325			7.55	54.4	39	23.4	10.75	0	31.65	3.25			9.8	25.05	13.375	13.825	9.65	0.375	0	2.85
	Rat2	6	5.5	7.65	65.525			1.05	80.9	89.15	20.5	30.525	5.075	0	1.55			0	17.925	14.025	7.5	0	1.6	1.45	0.5
	Rat5	0	4.71	12.725	15.8			1.55	84.525	82.725	31.9	14.275	22.9	10.75	11.225			2.4	68.125	72.9	55.475	16.775	2.025	0	5.125
	Rat6	3.5	7.16	5.75	85.5			7.55	91.675	92.5	48.6	7.875	21.1	14.6	1.425			1.55	23.15	6.375	5.425	1.95	0.875	5.6	4.25
	Rat9	0	12.7	6.775	70.25			1.55	54.05	37.55	5.175	40.325	39.5	0	3.675			1.6	10.525	26.875	0	1.95	0	0	2.325
	Rat10	0	8.93	38.525	67.4			8.15	77.825	84.45	13.7	6.35	5.25	5.675	8.315			0	58.85	16.6	30	4.5	14.75	35.3	25.425
	Rat13	0	10.83	37.375	91.325			1.55	66.175	12.25	10.925	1.075	1.25	6.93	1.6			1.55	6.325	0.875	0.7	1.575	1.775	1.85	3.4
	Mean	1.35714	7.77286	17.1393	69.0179			4.13571	72.7929	62.5179	22.0286	15.8821	13.5821	9.94357	4.43429			2.41429	29.9929	21.575	16.1321	5.2	3.05714	6.31429	6.26786
	SEM	0.917517	1.19601	5.45342	9.70137			1.28182	5.60318	12.1507	5.53001	5.37856	5.54941	4.13623	1.4521			1.27582	9.05387	9.09064	7.61117	2.26557	1.96915	4.88897	3.24072
	CIS
	Animals	Pretone	Tone Habituation	First Trial Block	Last Trial Block			Pretone	Trial Block1	Trial Block2	Trial Block3	Trial Block4	Trial Block5	Trial Block6	Trial Block7			Pretone	Trial Block1	Trial Block2	Trial Block3	Trial Block4	Trial Block5	Trial Block6	Trial Block7
	Rat3	0	15.44	0.7	73.65			15.6	89.9	88.25	43.9	45.425	11.725	16.05	2.4			0	17.1	18.7	16.8	6.5	4.45	8.375	1.075
	Rat4	0	3.23	7.575	46.2			2.35	84.475	93.4	47.9	37.95	0	14.325	17.15			5.45	40.15	28.55	15.525	8.275	5.125	4.25	1.75
	Rat7	1.55	18.78	75.2	98.45			6.55	87.175	100	54.5	60.6	73.6	20.225	1.175			3.1	87.1	65.825	60	90	42.025	14.525	4.625
	Rat8	1.6	1.34	0	72.975			23.35	88.4	88.25	53.9	25.425	11.725	16.05	2.4			15.6	19.825	6.8	0	2.375	10.15	1.725	3.425
	Rat11	1.55	17.21	30.2	92.15			1.55	87.175	100	82.445	60.6	73.6	20.225	1.175			0	18.8	21.8	0	1.95	1.575	0	0
	Rat12	1.6	2.51	0	71.9			1.4	87.9	82.225	36.845	14.65	8.67	22.35	17.575			1.55	8.925	3.975	30.125	0.975	1.575	4.2	3.65
	Rat14	0	12.7	10.125	76.55			27.8	87.175	100	54.5	60.6	73.6	20.225	1.175			0	19.825	6.8	15.25	2.375	10.15	1.725	3.425
	Rat15	0	7.43	35.575	77.4			8.26	5.875	38.35	12.425	9.95	4.15	1.4	1.55			4.85	40.15	28.55	20.525	8.275	9.125	4.25	1.75
	Mean	0.7875	9.83	19.9219	76.1594			10.8575	77.2594	86.3094	48.3019	39.4	32.1337	16.3562	5.575			3.81875	31.4844	22.625	19.7781	15.0906	10.5219	4.88125	2.4625
	SEM	0.297722	2.49735	9.27554	5.48766			3.63356	10.2119	7.24186	6.9589	7.39436	12.2165	2.34836	2.57884			1.85133	8.85588	7.07261	6.75493	10.7516	4.66897	1.63783	0.550061

## Sheet: Figure 1e
			Conditioning							Fear Recall and Extinction										Extinction Recall
	Control
	Animals	Pretone	Tone Habituation	First Trial Block	Last Trial Block			Pretone	Trial Block1	Trial Block2	Trial Block3	Trial Block4	Trial Block5	Trial Block6	Trial Block7			Pretone	Trial Block1	Trial Block2	Trial Block3	Trial Block4	Trial Block5	Trial Block6	Trial Block7
	Rat1	0	9.9	52	55.5			3.5	46.25	77.25	48.5	92.75	76.25	38	14			1	8	5.25	8.25	2.25	5	7	4.5
	Rat3	18.5	8.2	63.25	43.5			2	59.5	69.75	69.5	71	50.25	62	0			0	32	10.5	1	4.75	4	11.75	0
	Rat5	7	35	13.75	43.75			0.5	43.75	35	6.75	27.5	29.5	4.75	1.5			5.5	0.75	2.75	6.25	6.25	3.25	12.25	6.5
	Rat6	2	37.3	43.5	58.25			0	23.75	20	13.5	43	52.75	43.75	16.5			4	13.75	4	2.5	5	2.5	3.75	3
	Rat8	4	9.6	23.25	50.75			4.5	28.5	15.75	7.5	7.5	15.5	52.75	21.5			0	4.25	4	11	11.75	8	17	0
	Rat9	0	7.7	16.5	57			9	63.5	33.25	16	29.5	27.5	10.75	24.25			7.5	20	5	11.5	12	72	24	33
	Rat10	2	14.4	48.75	43.75			3	20.5	44.5	35.75	34.5	64.25	39.75	44.75			0	1	1.5	1.5	5	4	3	8
	Rat11	0	18.3	32.5	31.25			6	52	69.75	41.25	16.75	42.25	66.5	14.75			2.5	9	0	4	9.25	18.5	49.25	65.75
	Rat12	0	44.3	69	60.75			2	36	44	17	2.25	7.25	4.25	0.5			4.5	4	41.75	26.25	4.75	0	16.25	1.75
	Rat13	1	23.6	21.5	49.5			2	62.25	5.5	48	40.25	12.75	11.5	21.25			4	1.25	1.75	3.75	8	30.25	26	59.25
	Rat14	0	17.7	50.25	43.75			2.5	51.25	77.5	47.75	14.25	6	1.75	1			1	3	6.25	1.5	5	3.25	3	83.25
	Mean	3.13636	20.5455	39.4773	48.8864			3.18182	44.2955	44.75	31.9545	34.4773	34.9318	30.5227	14.5455			2.72727	8.81818	7.52273	7.04545	6.72727	13.7045	15.75	24.0909
	SEM	1.67344	3.89021	5.74995	2.63032			0.77246	4.61308	7.74648	6.28362	8.20133	7.21749	7.4042	4.11922			0.76978	2.93705	3.52563	2.22634	0.944153	6.41286	4.12435	9.34571
	CIS
	Animals	Pretone	Tone Habituation	First Trial Block	Last Trial Block			Pretone	Trial Block1	Trial Block2	Trial Block3	Trial Block4	Trial Block5	Trial Block6	Trial Block7			Pretone	Trial Block1	Trial Block2	Trial Block3	Trial Block4	Trial Block5	Trial Block6	Trial Block7
	Rat1	0.5	13.6	40.75	90.5			0	59	92.5	96	84.75	92.25	94.25	85.5			0.5	81.75	63	57.75	61.5	61.5	17.75	51
	Rat2	5	11.5	56	46.75			1	31.75	34	59	58.5	57.5	52.25	44.75			3	5.75	5.75	19.25	65	54.5	1.5	41.75
	Rat3	11.5	30.8	53.25	95.75			9	88.5	97.25	70.75	89	94.25	86	95			10.5	47.5	46	27	75.5	48.75	49	29.25
	Rat4	3.5	12.6	26.75	96			3	70.75	42.25	19.5	64.5	67.75	66.75	87.75			5	14.5	22.25	15.75	18.25	3.25	15	49.5
	Rat5	3.5	17.1	45	67.75			0	32.25	74	89.5	71.5	46.5	76.25	93.5			0	19.75	13.25	21	9.25	18.25	14.25	28.5
	Rat6	0	17.7	23.5	51.5			0	58	58	73	70	85.25	25.5	69.25			0	11.25	16.75	22	10.75	14.25	30.25	60.5
	Rat7	1.5	55.8	62.25	86.25			0	78	85.25	87	58.25	93.75	87	41.25			3.5	67.75	48.75	41.5	16.25	36.5	18.25	30.25
	Rat8	10.5	15.7	44.75	60			1	27.25	48	35.75	21	46	12	76.5			0	11.25	5.75	8.75	46.5	35.75	62.75	29
	Rat9	18	13.8	13.25	51.5			0.5	28.25	14.25	11	10.25	14.25	13	4.25			0	6.25	13	3.25	4.75	5	17.25	12
	Rat10	19	17.6	60.75	70.25			0.5	72.25	95	95.25	99.5	53	40	40			2.5	37	29.25	16.75	40.25	5.75	6.25	2.75
	Rat12	0	41.1	80.5	57			0	62.75	61.75	81	93.75	75.25	97.25	0			68.5	85.25	62	45.25	17.5	29.75	15.5	32
	Rat13	0	35.6	42.75	67.5			2	46.25	80.5	94	77.25	56.5	67	66.5			7.5	34	50.75	19.25	21.75	49.5	41	49.5
	Mean	6.08333	23.575	45.7917	70.0625			1.41667	54.5833	65.2292	67.6458	66.5208	65.1875	59.7708	58.6875			8.41667	35.1667	31.375	24.7917	32.2708	30.2292	24.0625	34.6667
	SEM	2.014	4.06187	5.37529	5.1704			0.740683	6.09282	7.70167	8.6813	7.87884	7.01636	8.91327	9.4705			5.54692	8.44194	6.2221	4.55624	7.06735	5.97584	5.25263	4.83275

## Sheet: Figure 1f
			Conditioning							Fear Recall and Extinction										Extinction Recall
	Control
	Animals	Pretone	Tone Habituation	First Trial Block	Last Trial Block			Pretone	Trial Block1	Trial Block2	Trial Block3	Trial Block4	Trial Block5	Trial Block6	Trial Block7			Pretone	Trial Block1	Trial Block2	Trial Block3	Trial Block4	Trial Block5	Trial Block6	Trial Block7
	Rat1	0	4.58	11.175	87.325			0	69.825	67.45	17.475	1.925	4.3	1.5	1.5			4.083	18.15	6.375	0.925	1.95	0.875	5.6	4.25
	Rat2	6	5.5	7.65	65.525			0.875	90.3	3.15	0	8.125	37.975	10.875	7.25			2.175	1.025	26.875	0	1.95	0	0	2.325
	Rat3	0	4.71	12.725	15.8			0	64.4	39	23.4	10.75	0	31.65	3.25			1.283	17.55	12.735	1.175	0.775	8.35	4.175	1.325
	Rat4	3.5	7.16	5.75	85.5			1.145	80.9	89.15	20.5	30.525	5.075	0	1.55			1.05	25.05	13.375	13.825	9.65	0.375	0	2.85
	Rat5	8.45	5.32	12.85	87.075			0	84.525	82.725	31.9	14.275	22.9	10.75	11.225			2.025	17.925	14.025	7.5	0	1.6	1.45	0.5
	Rat6	1.7	0.69	0.775	50.1			2.362	57.825	84.45	13.7	6.35	5.25	5.675	3.075			1.962	68.125	72.9	55.475	16.775	2.025	0	5.125
	Rat8	1.6	2.51	0	71.9			2.8	86.175	12.25	3.425	1.075	1.25	2.55	1.6			8.827	1.325	0.875	0.7	1.575	1.775	1.85	3.4
	Rat9	0	12.7	6.775	70.25			0.512	50.9	61.8	45.7	14.75	0.775	2.825	0			13.012	56.65	17.6	55	4.35	17.35	65.2	55.425
	Rat10	0	7.43	38.525	67.4			0	91.675	92.5	48.6	7.875	71.1	14.6	1.425			4.892	44.8	73.125	22.175	9.25	2.525	42.65	5.55
	Rat11	0	10.83	37.375	91.325			0.785	54.05	37.55	5.175	40.325	39.5	0	3.675			1.75	18.75	0.8	0	0	0.625	0	0.7
	Rat12	4.5	6.88	9.325	85.475			4.138	85.3	13.15	0	8.125	37.975	10.875	7.25			0	23.15	6.375	5.425	1.95	0.875	5.6	4.25
	Rat13	1.65	4.95	12.1	80.35			10.915	91.675	92.5	33.6	12.135	71.1	14.6	1.425			9.15	10.525	26.875	0	1.95	0	0	2.325
	Rat14	0	4.24	15.65	93			0.327	77.825	84.45	13.7	6.35	5.25	5.675	8.315			0	61.05	15.6	30	4.65	12.15	75.3	45.135
	Rat15	8.5	6.2	15.55	68.2			12.105	86.175	12.25	10.925	1.075	1.25	6.93	1.6			0	34.8	73.125	17.175	9.25	2.525	42.65	5.55
	Rat16	1.55	7.02	4.225	88.975			8.072	54.05	37.55	5.175	25.325	24.5	6.34	6.015			0.875	6.325	0.875	0.7	1.575	1.775	1.85	3.4
	Mean	2.49667	6.048	12.6967	73.88			2.93573	75.04	53.995	18.2183	12.599	21.88	8.323	3.94367			3.4056	27.0133	24.1023	14.005	4.37667	3.52167	16.4217	9.474
	SEM	0.784454	0.763447	2.92032	5.19336			1.05819	3.88666	8.62667	4.05417	2.91391	6.4	2.08214	0.846604			1.01615	5.5536	6.87091	4.94114	1.23373	1.30951	6.76236	4.32671
	CIS
	Animals	Pretone	Tone Habituation	First Trial Block	Last Trial Block			Pretone	Trial Block1	Trial Block2	Trial Block3	Trial Block4	Trial Block5	Trial Block6	Trial Block7			Pretone	Trial Block1	Trial Block2	Trial Block3	Trial Block4	Trial Block5	Trial Block6	Trial Block7
	Rat1	0	15.44	0.7	73.65			0.281	87.9	82.225	36.845	29.65	0	22.35	17.575			4.28	38.875	29.075	12.375	3.65	8.025	5.25	1.65
	Rat2	0	3.23	7.575	46.2			0	80.625	79.8	76.275	56.8	17.55	11.675	2.4			12.675	38.85	26.3	12.075	5.175	12.9	0	1.575
	Rat3	1.55	18.78	75.2	98.45			10.012	89.9	88.25	43.9	45.425	11.725	16.05	2.4			7.48	17.1	18.7	16.8	6.5	4.45	8.375	1.075
	Rat4	1.6	1.34	0	72.975			7.19	84.475	93.4	47.9	37.95	0	14.325	17.15			5.1	40.15	28.55	15.525	8.275	5.125	4.25	1.75
	Rat5	0	2.65	2.1	45.775			0	87.175	100	54.5	60.6	73.6	20.225	1.175			0.278	87.1	65.825	60	90	42.025	14.525	4.625
	Rat7	1.3	13.27	9.05	70.15			0.783	5.875	38.35	12.425	9.95	4.15	1.4	1.55			0	19.825	6.8	0	2.375	10.15	1.725	3.425
	Rat8	0	4.06	9.245	53.51			1.297	5.475	68.2	6.475	3.975	14.05	0	0			6.297	18.8	21.8	0	1.95	1.575	0	0
	Rat9	1.05	17.44	20.18	88.64			2.525	77.7	50.225	30.15	10.1	7.725	7.55	4.95			2.36	8.925	3.975	30.125	0.975	1.575	4.2	3.65
	Rat10	1.6	2.51	0	71.9			0	53.9	33.1	10.8	8.875	2.9	4.625	0.925			4.74	37.875	0	0	0.875	0	2.325	0
	Rat12	0	12.7	6.775	70.25			0	86.825	62.5	93.075	72.775	28.2	9.6	0			0	22.1	10.4	4.375	2.975	0.7	4.125	0
	Rat13	0	7.43	38.525	77.4			7.432	88.4	88.25	53.9	45.425	11.725	16.05	2.4			0	35.15	23.35	17.225	8.7975	6.725	3.75	2.75
	Rat14	4.5	6.88	9.325	87.975			2.61	84.935	98.25	80.415	54.5	66.6	18.025	5.175			3.41	11.425	11.775	31.225	7.975	1.765	4	3.15
	Rat15	1.65	4.95	12.1	85.35			3.02	78.92	52.975	37.13	17.28	10.8	9.78	8.95			2.92	20.925	11.23	21.85	1.175	9.15	2.475	2.825
	Rat16	0	4.24	15.65	93			5.4	88.92	81.225	41.905	33.57	12.595	22.32	14.575			4.844	37.65	21.52	16.125	7.775	8.315	4.225	1.85
	Mean	0.946429	8.20857	14.7446	73.9446			2.89643	71.5018	72.625	44.6925	34.7768	18.6871	12.4268	5.65893			3.88457	31.0536	19.95	16.9786	10.6052	8.03429	4.23036	2.02321
	SEM	0.337633	1.6178	5.37425	4.40565			0.888149	7.8371	5.87904	6.95148	5.93019	6.15718	1.95356	1.69097			0.940719	5.23165	4.31027	4.27245	6.15687	2.82158	0.975733	0.38833
