# Supplementary material for: Extinction recall of fear memories formed before stress is not affected despite higher theta activity in the amygdala
Source: eLife. 2018 Aug 13;7:e35450. doi: 10.7554/eLife.35450 (PMC6125126; doi:10.7554/eLife.35450)
Supplement: Figure 2—source data 1. [file elife-35450-fig2-data1.xlsx]

## Sheet: Figure 2b
	Freezing%
	Control
	Animals	Before Conditioning	Fear Recall	Extinction Recall
	Rat1	4.58	54.4	25.05
	Rat2	5.5	80.9	17.925
	Rat5	4.71	84.525	68.125
	Rat6	7.16	91.675	23.15
	Rat9	12.7	54.05	10.525
	Rat10	8.93	77.825	58.85
	Rat13	10.83	66.175	6.325
	Mean	7.77286	72.7929	29.9929
	SEM	1.19601	5.60318	9.05387
	CIS
	Animals	Before Conditioning	Fear Recall	Extinction Recall
	Rat3	15.44	89.9	17.1
	Rat4	3.23	84.475	40.15
	Rat7	18.78	84.14	87.1
	Rat8	1.34	88.4	19.825
	Rat11	17.21	87.175	18.8
	Rat12	2.51	87.9	8.925
	Rat14	12.7	80.21	19.825
	Rat15	7.43	15.875	40.15
	Mean	9.83	77.2594	31.4844
	SEM	2.49735	8.8354	8.85588

## Sheet: Figure 2e
	AEP Amplitude							Theta Power
	Control							Control
	Animals	Before Conditioning	Fear Recall	Extinction Recall				Animals	Before Conditioning	Fear Recall	Extinction Recall
	Rat1	100	89.8551	101.041				Rat1	1.57393	226.908	130.549
	Rat2	100	170.345	66.2073				Rat2	143.007	184.345	0.343448
	Rat5	100	206.017	104.8				Rat5	71.9492	123.194	-90.2825
	Rat6	100	242.567	36.6178				Rat6	152.843	161.64	190.135
	Rat9	100	150.348	28.5325				Rat9	20.0015	207.105	126.188
	Rat10	100	89.8551	110.399				Rat10	61.5172	120.194	-70.8145
	Rat13	100	201.951	116.554				Rat13	30.4335	187.604	105.456
	Mean	100	164.42	80.5931				Mean	68.7608	172.999	55.9392
	SEM	0	22.146	13.833				SEM	22.3636	15.2825	41.26
	CIS							CIS
	Animals	Before Conditioning	Fear Recall	Extinction Recall				Animals	Before Conditioning	Fear Recall	Extinction Recall
	Rat3	100	188.176	196.222				Rat3	-95.4464	155.351	117.469
	Rat4	100	189.351	183.048				Rat4	5.43394	121.771	134.816
	Rat7	100	123.261	100.426				Rat7	70.4321	143.349	158.607
	Rat8	100	196.656	198.024				Rat8	135.199	254.806	149.553
	Rat11	100	94.0031	369.039				Rat11	121.185	238.891	173.352
	Rat12	100	93.6124	194.363				Rat12	94.1862	147.633	197.493
	Rat14	100	149.118	106.096				Rat14	146.237	271.545	189.375
	Rat15	100	147.623	388.925				Rat15	109.966	134.591	183.484
	Mean	100	147.725	217.018				Mean	73.3991	183.492	163.019
	SEM	0	14.7467	38.0368				SEM	28.7583	21.4636	9.89201

## Sheet: Figure 2f
	AEP Amplitude							Theta Power
	Control							Control
	Animals	Before Conditioning	Fear Recall	Extinction Recall				Animals	Before Conditioning	Fear Recall	Extinction Recall
	Rat1	100	168.948	8.07848				Rat1	81.8937	186.184	140.549
	Rat2	100	199.785	34.033				Rat2	107.327	130.059	1.34345
	Rat5	100	216.392	73.4332				Rat5	216.679	221.735	30.2123
	Rat6	100	282.632	49.6171				Rat6	27.3724	99.8696	70.135
	Rat9	100	144.399	52.0837				Rat9	69.4996	243.629	133.088
	Rat10	100	208.734	64.201				Rat10	159.468	250.903	60.7825
	Rat13	100	176.606	18.3107				Rat13	12.4045	177.596	146.658
	Mean	100	199.643	42.8224				Mean	96.3777	187.139	83.2526
	SEM	0	16.744	9.01219				SEM	27.3069	21.503	21.8142
	CIS							CIS
	Animals	Before Conditioning	Fear Recall	Extinction Recall				Animals	Before Conditioning	Fear Recall	Extinction Recall
	Rat3	100	183.694	134.412				Rat3	39.9673	174.456	160.173
	Rat4	100	82.2463	23.8389				Rat4	22.9698	220.543	119.344
	Rat7	100	148.396	117.908				Rat7	-54.6178	125	-70.7825
	Rat8	100	55.8795	28.7403				Rat8	223.238	273.44	190.135
	Rat11	100	101.226	32.9239				Rat11	106.677	229.882	176.088
	Rat12	100	167.368	109.41				Rat12	240.393	200.967	130.179
	Rat14	100	149.565	185.089				Rat14	89.9937	223.283	126.692
	Rat15	100	133.765	167.906				Rat15	194.25	316.282	123.274
	Mean	100	127.768	100.029				Mean	107.859	220.482	119.388
	SEM	0	15.5708	22.6867				SEM	37.051	20.5697	28.7331
