# Supplementary material for: Extinction recall of fear memories formed before stress is not affected despite higher theta activity in the amygdala
Source: eLife. 2018 Aug 13;7:e35450. doi: 10.7554/eLife.35450 (PMC6125126; doi:10.7554/eLife.35450)
Supplement: Figure 2—source data 2. [file elife-35450-fig2-data2.xlsx]

## Sheet: Figure 2_2b
	Freezing%
	Control
	Animals	Trial Block1	Trial Block4	Trial Block7
	Rat1	54.4	10.75	3.25
	Rat2	80.9	30.525	1.55
	Rat5	84.525	14.275	11.225
	Rat6	91.675	7.875	1.425
	Rat9	54.05	40.325	3.675
	Rat10	77.825	6.35	8.315
	Rat13	66.175	1.075	1.6
	Mean	72.7929	15.8821	4.43429
	SEM	5.60318	5.37856	1.4521
	CIS
	Animals	Trial Block1	Trial Block4	Trial Block7
	Rat3	89.9	45.425	2.4
	Rat4	84.475	37.95	17.15
	Rat7	84.14	60.6	1.175
	Rat8	88.4	25.425	2.4
	Rat11	87.175	60.6	1.175
	Rat12	87.9	14.65	17.575
	Rat14	80.21	60.6	1.175
	Rat15	15.875	9.95	1.55
	Mean	77.2594	39.4	5.575
	SEM	8.8354	7.39436	2.57884

## Sheet: Figure 2_2c
	AEP Amplitude							Theta Power
	Control							Control
	Animals	Trial Block1	Trial Block4	Trial Block7				Animals	Trial Block1	Trial Block4	Trial Block7
	Rat1	89.8551	55.0113	129.889				Rat1	226.908	138.724	86.3929
	Rat2	170.345	126.349	90.124				Rat2	184.345	-42.6539	108.849
	Rat5	205.984	173.072	153.968				Rat5	123.194	-114.533	118.356
	Rat6	242.567	249.693	208.814				Rat6	161.64	81.314	-76.4982
	Rat9	146.348	108.506	172.48				Rat9	207.105	193.915	185.398
	Rat10	89.8551	55.0113	69.8889				Rat10	120.194	102.724	88.3565
	Rat13	205.984	173.072	123.968				Rat13	187.604	161.915	124.398
	Mean	164.42	134.388	135.59				Mean	172.999	74.4863	90.7504
	SEM	22.3839	26.5581	18.0025				SEM	15.2825	42.63	30.5415
	CIS							CIS
	Animals	Trial Block1	Trial Block4	Trial Block7				Animals	Trial Block1	Trial Block4	Trial Block7
	Rat3	188.176	201.774	247.534				Rat3	155.351	217.533	147.06
	Rat4	189.351	305.394	179.194				Rat4	121.771	188.752	139.877
	Rat7	123.261	87.1278	65.7885				Rat7	143.349	209.398	271.266
	Rat8	196.656	121.271	117.528				Rat8	254.806	199.177	167.428
	Rat11	74.0031	375.929	192.769				Rat11	238.891	221.519	212.854
	Rat12	73.6124	135.395	189.062				Rat12	147.633	93.1777	241.243
	Rat14	149.118	162.103	109.849				Rat14	271.545	187.132	116.347
	Rat15	147.623	170.201	403.75				Rat15	134.591	59.3521	73.7448
	Mean	142.725	194.899	188.184				Mean	183.492	172.005	171.227
	SEM	17.4701	34.6643	36.8886				SEM	21.4636	21.5782	23.4288

## Sheet: Figure 2_2d
	AEP Amplitude							Theta Power
	Control							Control
	Animals	Trial Block1	Trial Block4	Trial Block7				Animals	Trial Block1	Trial Block4	Trial Block7
	Rat1	168.949	116.414	207.872				Rat1	186.184	123.151	104.349
	Rat2	199.785	131.846	106.783				Rat2	130.059	67.2295	77.8817
	Rat5	216.392	176.436	118.349				Rat5	221.735	142.826	17.8506
	Rat6	282.632	136.64	115.595				Rat6	99.8696	21.9151	46.9125
	Rat9	144.399	65.456	86.6462				Rat9	243.629	181.255	148.318
	Rat10	216.392	176.436	118.349				Rat10	250.903	131.255	117.882
	Rat13	168.949	116.414	207.872				Rat13	177.596	181.255	46.9125
	Mean	199.643	131.377	137.352				Mean	187.139	121.269	80.0152
	SEM	17.1718	14.5422	18.6747				SEM	21.503	22.1231	17.4246
	CIS							CIS
	Animals	Trial Block1	Trial Block4	Trial Block7				Animals	Trial Block1	Trial Block4	Trial Block7
	Rat3	183.694	128.214	151.484				Rat3	174.456	50.737	70.723
	Rat4	82.2463	85.5035	78.1956				Rat4	220.543	177.337	116.379
	Rat7	148.396	167.067	35.4539				Rat7	125	20.7114	75.205
	Rat8	55.8795	52.6017	27.384				Rat8	273.44	249.363	87.2221
	Rat11	101.226	36.7216	43.865				Rat11	229.882	173.65	130.987
	Rat12	167.368	198.042	186.676				Rat12	200.967	201.386	177.327
	Rat14	149.565	78.6186	158.908				Rat14	223.283	134.424	65.8167
	Rat15	133.765	132.313	223.517				Rat15	316.282	142.436	-22.0497
	Mean	127.768	109.885	113.185				Mean	220.482	143.756	87.7012
	SEM	15.5708	19.8597	26.9142				SEM	20.5697	26.8517	20.5711
