# Supplementary material for: Extinction recall of fear memories formed before stress is not affected despite higher theta activity in the amygdala
Source: eLife. 2018 Aug 13;7:e35450. doi: 10.7554/eLife.35450 (PMC6125126; doi:10.7554/eLife.35450)
Supplement: Figure 3—source data 1. [file elife-35450-fig3-data1.xlsx]

## Sheet: Figure 2b
	Theta Coherence
	Control
	Animals	Before Conditioning	Fear Recall	Extinction Recall
	Rat1	0.0163808	0.0694409	0.199531
	Rat2	0.0170104	0.253553	0.153554
	Rat5	-0.0851596	0.0118463	0.456476
	Rat6	-0.0983947	0.0235875	0.0668489
	Rat9	-0.0419705	0.313401	0.140967
	Rat10	-0.0201036	0.283554	0.273853
	Rat13	0.0197048	0.341907	0.340967
	Mean	-0.0275046	0.185327	0.233171
	SEM	0.0187399	0.0545345	0.050421
	CIS
	Animals	Before Conditioning	Fear Recall	Extinction Recall
	Rat3	-0.115378	0.271106	-0.163686
	Rat4	-0.239541	0.282878	0.232371
	Rat7	0.0343866	-0.122756	-0.123718
	Rat8	0.163575	-0.144427	-0.283243
	Rat11	-0.127749	-0.0249071	0.00452507
	Rat12	0.106205	-0.107453	-0.00522055
	Rat14	-0.0381287	-0.0103815	-0.256452
	Rat15	-0.0840996	0.180525	-0.0915906
	Mean	-0.0375912	0.0405731	-0.0858769
	SEM	0.0469522	0.0628406	0.058482

## Sheet: Figure 2c
	dmPFC leads BLA (ms)
	Control
	Animals	Before Conditioning	Fear Recall	Extinction Recall
	Rat1	1.63808	16.9441	19.9531
	Rat2	1.70104	25.3554	15.3553
	Rat5	-8.51597	12.1846	35.6476
	Rat6	-9.83947	2.35875	6.68489
	Rat9	-4.19705	31.3401	24.0968
	Rat10	-2.01036	25.3554	25.3554
	Rat13	1.97048	21.3401	34.0968
	Mean	-2.75046	19.2683	23.0271
	SEM	1.87399	3.66982	3.85373
	CIS
	Animals	Before Conditioning	Fear Recall	Extinction Recall
	Rat3	-11.5378	27.1106	-16.3686
	Rat4	-23.9541	28.2878	23.2371
	Rat7	3.43865	-12.2756	-12.3718
	Rat8	16.3575	-14.4427	-28.3243
	Rat11	-12.7749	-2.49071	4.52507
	Rat12	10.6205	-10.7453	-5.22055
	Rat14	-3.81287	-10.3814	-25.6452
	Rat15	-8.40996	18.0525	-9.15906
	Mean	-3.75912	2.8894	-8.66593
	SEM	4.69522	6.52332	5.90359
