# Supplementary material for: Extinction recall of fear memories formed before stress is not affected despite higher theta activity in the amygdala
Source: eLife. 2018 Aug 13;7:e35450. doi: 10.7554/eLife.35450 (PMC6125126; doi:10.7554/eLife.35450)
Supplement: Figure 3—source data 2. [file elife-35450-fig3-data2.xlsx]

## Sheet: Figure 3_1b
	Theta Coherence
	Control
	Animals	Trial Block1	Trial Block4	Trial Block7
	Rat1	0.0694409	-0.158683	0.23498
	Rat2	0.253553	0.0122351	0.0838882
	Rat5	0.0118463	-0.0543741	0.0389573
	Rat6	0.0235875	0.343533	0.258285
	Rat9	0.313401	0.303009	0.0529691
	Rat10	0.283554	0.315758	0.183827
	Rat13	0.341907	0.212904	0.152465
	Mean	0.185327	0.139197	0.143625
	SEM	0.0545345	0.0767674	0.0330689
	CIS
	Animals	Trial Block1	Trial Block4	Trial Block7
	Rat3	0.271106	-0.263326	-0.0995586
	Rat4	0.282878	0.0437792	-0.139737
	Rat7	-0.122756	0.210587	0.0174377
	Rat8	-0.144427	-0.15413	-0.0648633
	Rat11	-0.0249071	-0.116579	0.0326147
	Rat12	-0.107453	0.385965	0.11687
	Rat14	-0.0103815	0.207256	-0.0698923
	Rat15	0.180525	0.077438	-0.18346
	Mean	0.0405731	0.0488738	-0.0488236
	SEM	0.0628406	0.0769696	0.0348836

## Sheet: Figure 3_1c
	dmPFC leads BLA (ms)
	Control
	Animals	Trial Block1	Trial Block4	Trial Block7
	Rat1	16.9441	4.01405	14.3973
	Rat2	25.3554	21.4205	18.6584
	Rat5	12.1846	16.7495	15.3279
	Rat6	2.35875	7.492	21.55
	Rat9	31.3401	22.5101	24.6489
	Rat10	25.3554	19.0507	0.211421
	Rat13	21.3401	14.4055	5.09741
	Mean	19.2683	15.0918	14.2702
	SEM	3.66982	2.64776	3.31983
	CIS
	Animals	Trial Block1	Trial Block4	Trial Block7
	Rat3	27.1106	16.7181	-9.14431
	Rat4	28.2878	-5.12544	-4.05358
	Rat7	-12.2756	0.566354	-11.7296
	Rat8	-14.4427	8	-2.0926
	Rat11	-2.49071	14.0586	-0.402555
	Rat12	-10.7453	-8.96496	18.7428
	Rat14	-10.3814	-12.8023	9.85226
	Rat15	18.0525	-4.67203	0.257217
	Mean	2.8894	0.972284	0.178703
	SEM	6.52332	3.84119	3.51107
