# Supplementary material for: Extinction recall of fear memories formed before stress is not affected despite higher theta activity in the amygdala
Source: eLife. 2018 Aug 13;7:e35450. doi: 10.7554/eLife.35450 (PMC6125126; doi:10.7554/eLife.35450)
Supplement: Figure 4—source data 1. [file elife-35450-fig4-data1.xlsx]

## Sheet: Figure 4b
		Freezing %
			Conditioning						Fear Recall and Extinction									Extinction Recall
	Control+Muscimol
	Animals	Pretone	Tone Habituation	First Trial Block	Last Trial Block			Trial Block1	Trial Block2	Trial Block3	Trial Block4	Trial Block5	Trial Block6	Trial Block7			Trial Block1	Trial Block2	Trial Block3	Trial Block4	Trial Block5	Trial Block6	Trial Block7
	IN1	6.105	13.327	35.075	95.4875			94.045	72.0125	50.465	31.5767	21.0325	0	0			12.2117	17.3325	31.25	31.2267	29.7625	4.1425	29.785
	IN2	2.615	9.19933	27.4225	62.81			74.9433	77.8825	55.4025	71.7867	59.485	66.78	13.4017			1.74167	1.5575	7.4975	1.26	0	2.26	19.0433
	IN3	9.04	14.6133	48.635	95.12			90.65	94.295	72.69	31.4417	22.04	0.9275	0.808333			55.6417	27.685	7.49	4.775	2.4175	5.5	13.3033
	IN5	16.61	9.89433	34.2925	54.8725			92.0817	88.2825	77.3	0	15.315	0	0			10.0233	0	0.7975	3.26667	1.275	0	0.541667
	IN6	6.05	9.29867	30.6225	94.9675			97.2583	51.85	67.21	64.8433	2.9175	18.295	22.4283			3.34667	1.98	3.7175	30.6117	1.595	6.175	0
	IN10	12.93	1.049	10.3625	85.84			57.3467	54.99	24.3625	0.79	0	0	0			6.88333	0	0	2.965	4.5925	40.1175	1.28667
	IN15	0	1.685	4.2675	93.5375			86.9178	96.565	58.1775	0	0	0	0			4.86667	5.3325	7.5425	2.92167	7.8975	11.925	8.51333
	Mean	7.62143	8.4381	27.2396	83.2336			84.749	76.5539	57.9439	28.634	17.2557	12.2861	5.23405			13.5307	7.69821	8.32786	11.0038	6.79143	10.0171	10.3533
	SEM	2.17621	1.98613	5.75891	6.47995			5.30775	6.81459	6.66927	11.5521	7.9062	9.43462	3.42095			7.15363	4.04386	4.00817	5.15701	3.95335	5.20957	4.22819
	CIS+Muscimol
	Animals	Pretone	Tone Habituation	First Trial Block	Last Trial Block			Trial Block1	Trial Block2	Trial Block3	Trial Block4	Trial Block5	Trial Block6	Trial Block7			Trial Block1	Trial Block2	Trial Block3	Trial Block4	Trial Block5	Trial Block6	Trial Block7
	IN9	0	1.78633	40.245	83.77			85.845	82.2375	97.295	100	95.9825	79.29	84.1883			1.34167	0.965	2.0175	0	7.4975	0	0.39
	IN11	16.505	10.0363	28.3625	66.1125			87.02	81.8625	61.7275	29.3783	66.415	0	0			1.53333	1.035	1.1	3.86667	0	0	0.943333
	IN12	0	7.98267	9.775	72.4375			80.9317	81.6475	90.4625	7.29167	5.9025	0.55	0			13.37	3.1425	1.205	1.41167	0	2.0475	1.295
	IN13	0	9.74167	12.1425	73.52			95.85	94.7575	92.1375	91.1067	98.9075	88.295	0			1.33333	0	0	2.445	4.605	1.78	6.88833
	IN16	13.825	13.8493	25.9525	81.1825			90.8967	96.2975	91.1475	49.2267	0	0	0			9	0.8425	6.82	1.65167	0	3.2575	4.67833
	IN17	3.965	13.195	31.355	74.1125			78.4217	94.6925	94.1925	95.275	0	0	0			2.43667	0	0.6725	6.33333	2.9325	1.08	2.91167
	IN18	1.235	7.546	20.8675	56.3375			96.8467	63.9575	65.2475	79.3683	16.8775	0	0			22.3867	4.1475	5.5625	13.4767	1.6125	1.77	45.145
	IN19	3.75	9.95467	10.725	79.4775			86.0667	75.25	80.5875	88.3483	48.3325	36.0875	0			0.436667	0	4.525	1.85	1.46	0.915	2.675
	Mean	4.91	9.2615	22.4281	73.3688			87.7348	83.8378	84.0997	67.4994	41.5522	25.5278	10.5235			6.47979	1.26656	2.73781	3.87938	2.26344	1.35625	8.11583
	SEM	2.32221	1.32482	3.89611	3.13596			2.30977	3.9473	4.81627	12.2275	14.7898	13.4776	10.5235			2.79373	0.550258	0.897905	1.52601	0.942685	0.387141	5.34326

## Sheet: Figure4c
	Control					Control+Muscimol
	Animals		Trial Block1 of Fear Recall			Animals		Trial Block1 of Fear Recall
	Rat1		54.4			IN1		94.045
	Rat2		80.9			IN2		74.9433
	Rat5		84.525			IN3		90.65
	Rat6		91.675			IN5		92.0817
	Rat9		54.05			IN6		97.2583
	Rat10		77.825			IN10		57.3467
	Rat13		66.175			IN15		86.9178
	Mean		72.7929			Mean		84.749
	SEM		5.60318			SEM		5.30775
	CIS					CIS+Muscimol
	Animals		Trial Block1 of Fear Recall			Animals		Trial Block1 of Fear Recall
	Rat3		89.9			IN9		85.845
	Rat4		84.475			IN11		87.02
	Rat7		87.175			IN12		80.9317
	Rat8		88.4			IN13		95.85
	Rat11		87.175			IN16		90.8967
	Rat12		87.9			IN17		78.4217
	Rat14		87.175			IN18		96.8467
	Rat15		5.875			IN19		86.0667
	Mean		77.2594			Mean		87.7348
	SEM		10.2119			SEM		2.30977
